# Supplementary material
Source: PubMed Central journal article supplement (PMC3346405)
Supplement: supp_78.11.3846_AEM-AEM00202-12-s02.pdf [file supp_78.11.3846_AEM-AEM00202-12-s02.pdf]

## Protocol S2:

### **A new range of vectors with a stringent 5-fluoro orotic acid-based counterselection system, for generating mutants by allelic replacement in *Staphylococcus aureus*.**

Peter Redder\* and Patrick Linder

#### **Detailed protocol for using pRLSAYx9 vectors:**

pRLSAYT9 is used as example.

Mediums used:

MH: Mueller-Hinton

MHT: MH with 2 µg/ml tetracyclin

MHFOA: MH with 200 µg/ml 5-fluoro-orotate

MHT+FOA: MHFOA with 10 µg/ml erythromycin

MHU: MH with 10 µg/ml uracil

RH: Sigma R7388 (basically RPMI-1640 medium with 20 mM Hepes and L-glutamine)

Agar is used at 13 g/l

- 1) pRLSAYT9 is transformed into the *pyrFE*<sup>-</sup> strain, and colonies are selected on MHT.
- 2) The transformants are restreaked once on MHT to ensure clonal purity.
- 3) 10 µl of an overnight liquid culture (in MHT) is added to 5 ml MHT+FOA and incubated with agitation for 6 hours at 42°C (the FOA is to ensure that pRLSAYT9 recombines into the region of homology which is downstream of the *pyrFE* mutation, and therefore does not complement the *pyrFE*<sup>-</sup> phenotype).
- 4) 50 µl of the culture is plated on MHT+FOA at 42°C.
- 5) Colonies are restreaked on MHT+FOA at 42°C. These colonies can be checked by spotting on MH, RH, MHT and MHFOA, there should be no growth on RH.
- 6) 10 µl of an overnight liquid (MHT+FOA) culture is added to 5 ml MH medium and incubated with agitation for 6 hours at 42°C.
- 7) 50 µl of the culture is plated on RH, at 42°C.
- 8) Colonies are restreaked on RH at 42°C.
- 9) Restreaked colonies are resuspended in 500 µl RH, and 5 µl spots are spotted on MH, RH, MHT and MHFOA-plates at 30°C.
- 10) Strains that grow on MH and RH, but NOT on MHT or MHFOA are restreaked once more, to ensure clonal purity.
- 11) PCR the *pyrFE* region and sequence it, to verify the reversion to wild-type.
