# Supplementary material
Source: PubMed Central journal article supplement (PMC3346405)
Supplement: supp_78.11.3846_AEM-AEM00202-12-s04.pdf [file supp_78.11.3846_AEM-AEM00202-12-s04.pdf]

A

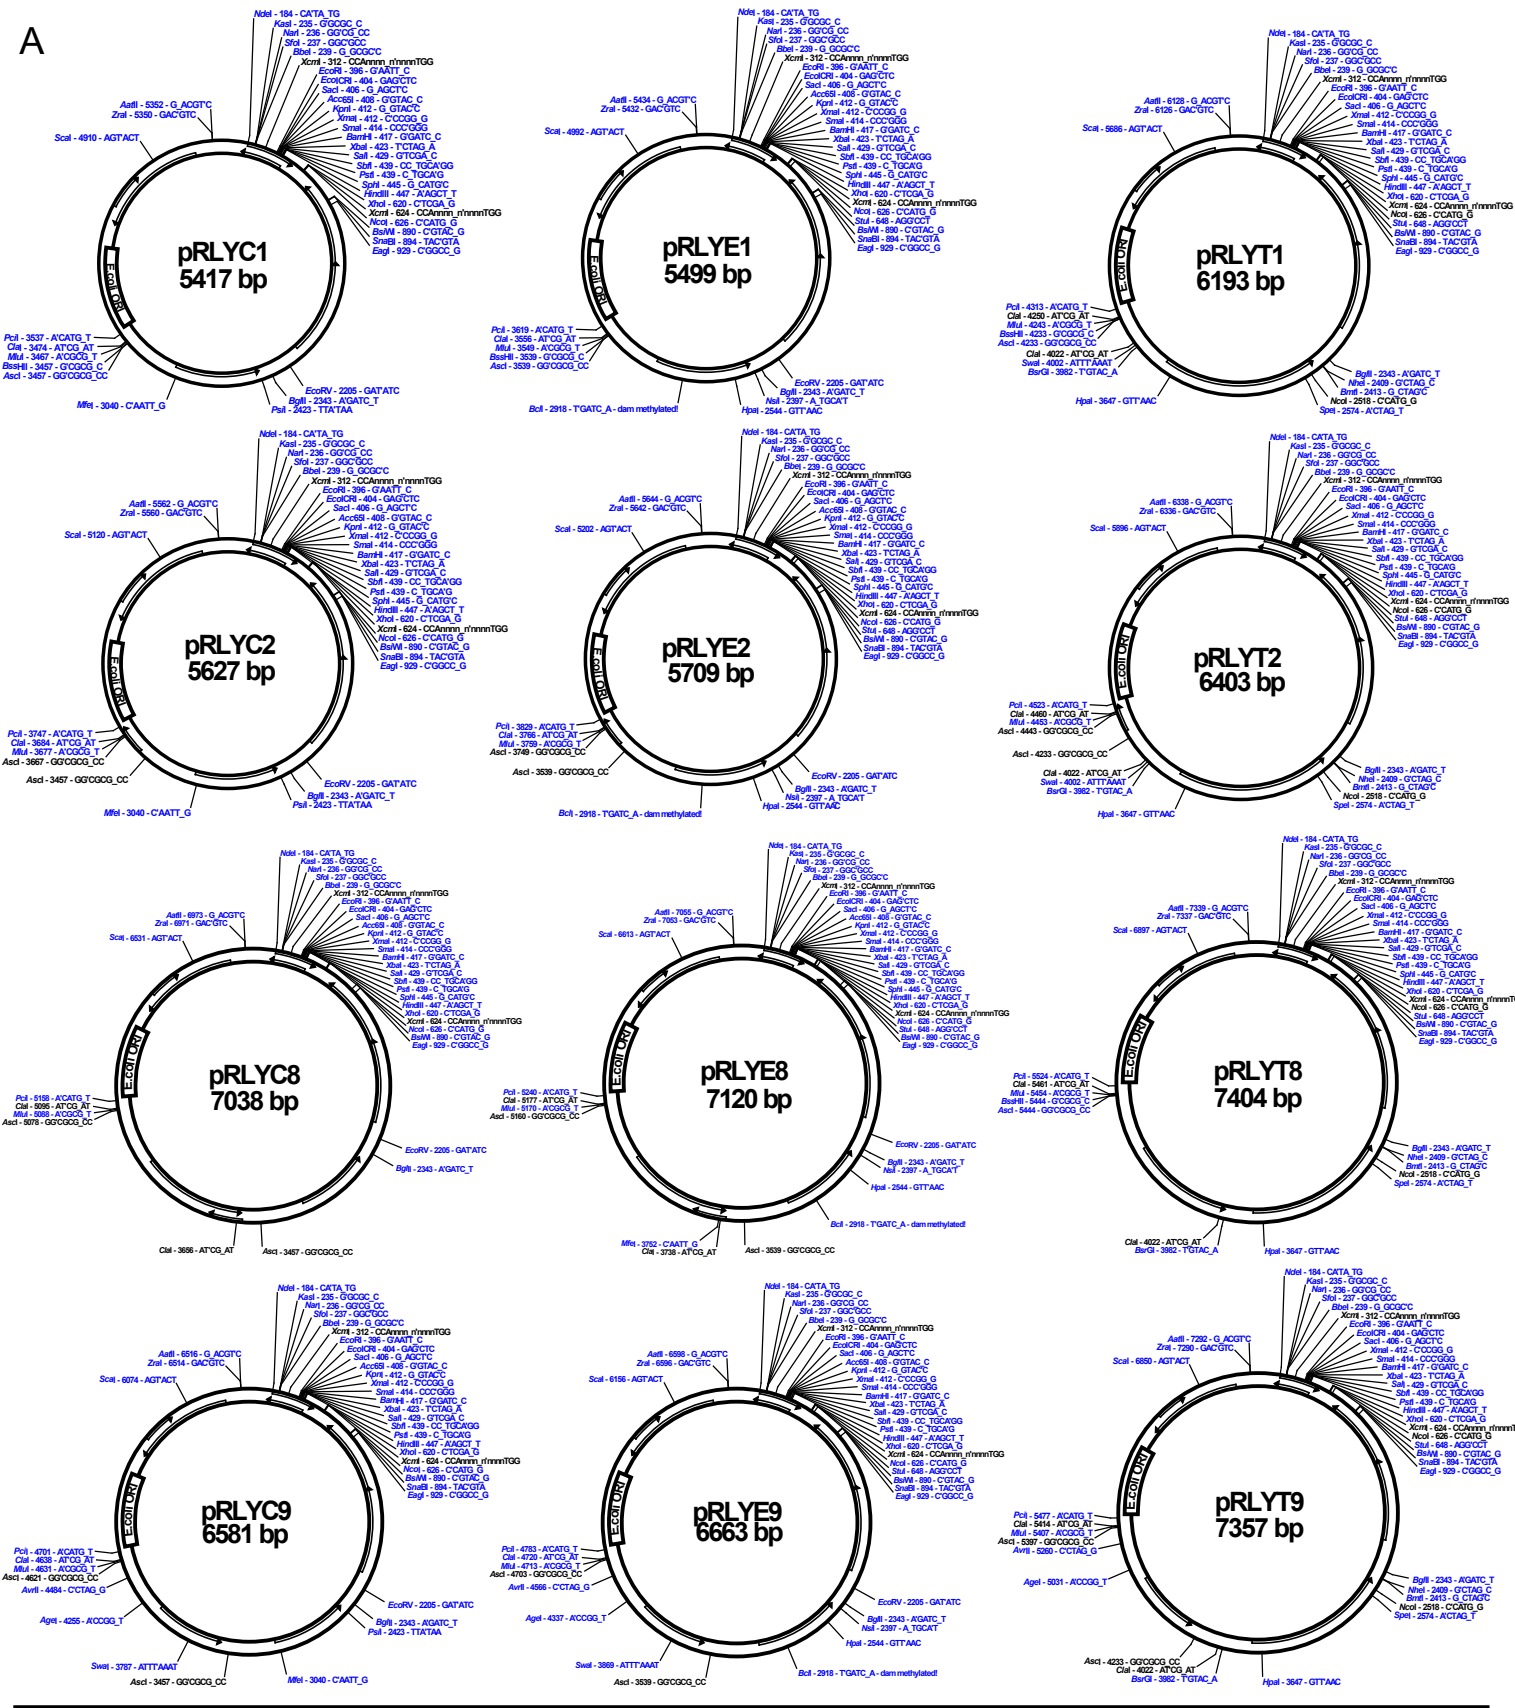

B

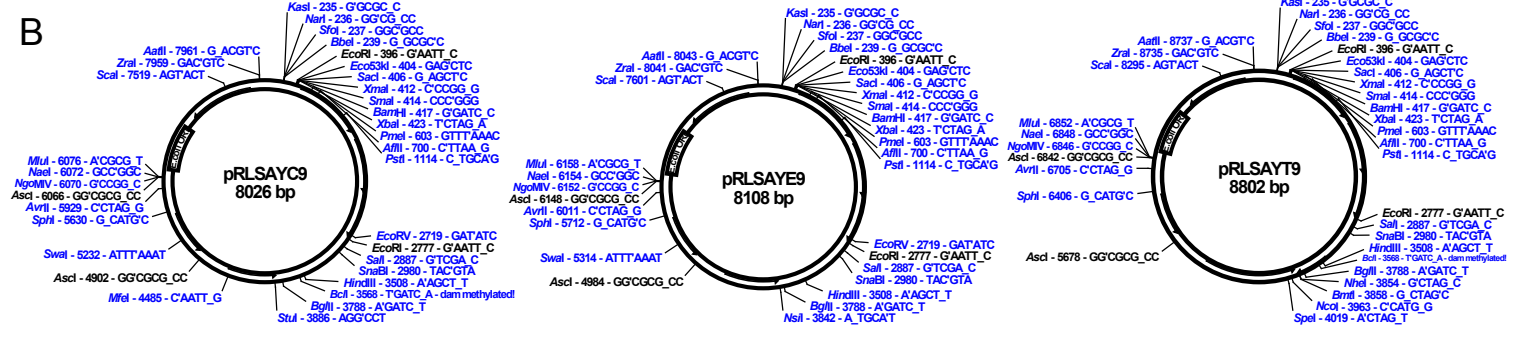

Figure S1: Summary of all the final pRLY-vectors described in the text. Unique restriction sites are in blue, and other restriction sites of interest are in black. A) pRLY-based counterselection vectors expressing the pyrFE genes. B) pRLSAYx9 plasmids, that are used to restore the pyrFE genes to wildtype.
