# Supplementary material
Source: PubMed Central journal article supplement (PMC3346405)
Supplement: supp_78.11.3846_AEM-AEM00202-12-s05.pdf [file supp_78.11.3846_AEM-AEM00202-12-s05.pdf]

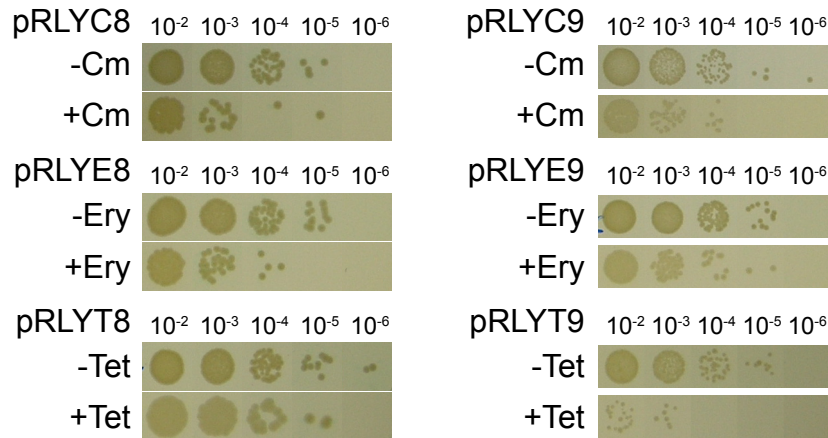

Figure S2:

Thermosensitivity of the pRLYx8 and pRLYx9 vectors.

5 µl of overnight cultures were transferred to 3 ml pre-heated MH medium, and incubated at 42°C with agitation for 7 hours. A dilution series of the culture was made. 5 µl drops were spotted on MHC, MHE and MHT-plates for pRLYC, pRLYE and pRLYT-vectors, respectively, to score cells that retained the plasmids. 5 µl drops were spotted on MH-plates to score the total number of cells. All plates were then incubated at 30°C and colony-counts were compared between MH and antibiotic containing plates. Loss of plasmid was usually around 90 percent.
