# Supplementary material
Source: PubMed Central journal article supplement (PMC3346405)
Supplement: supp_78.11.3846_AEM-AEM00202-12-s06.pdf [file supp_78.11.3846_AEM-AEM00202-12-s06.pdf]

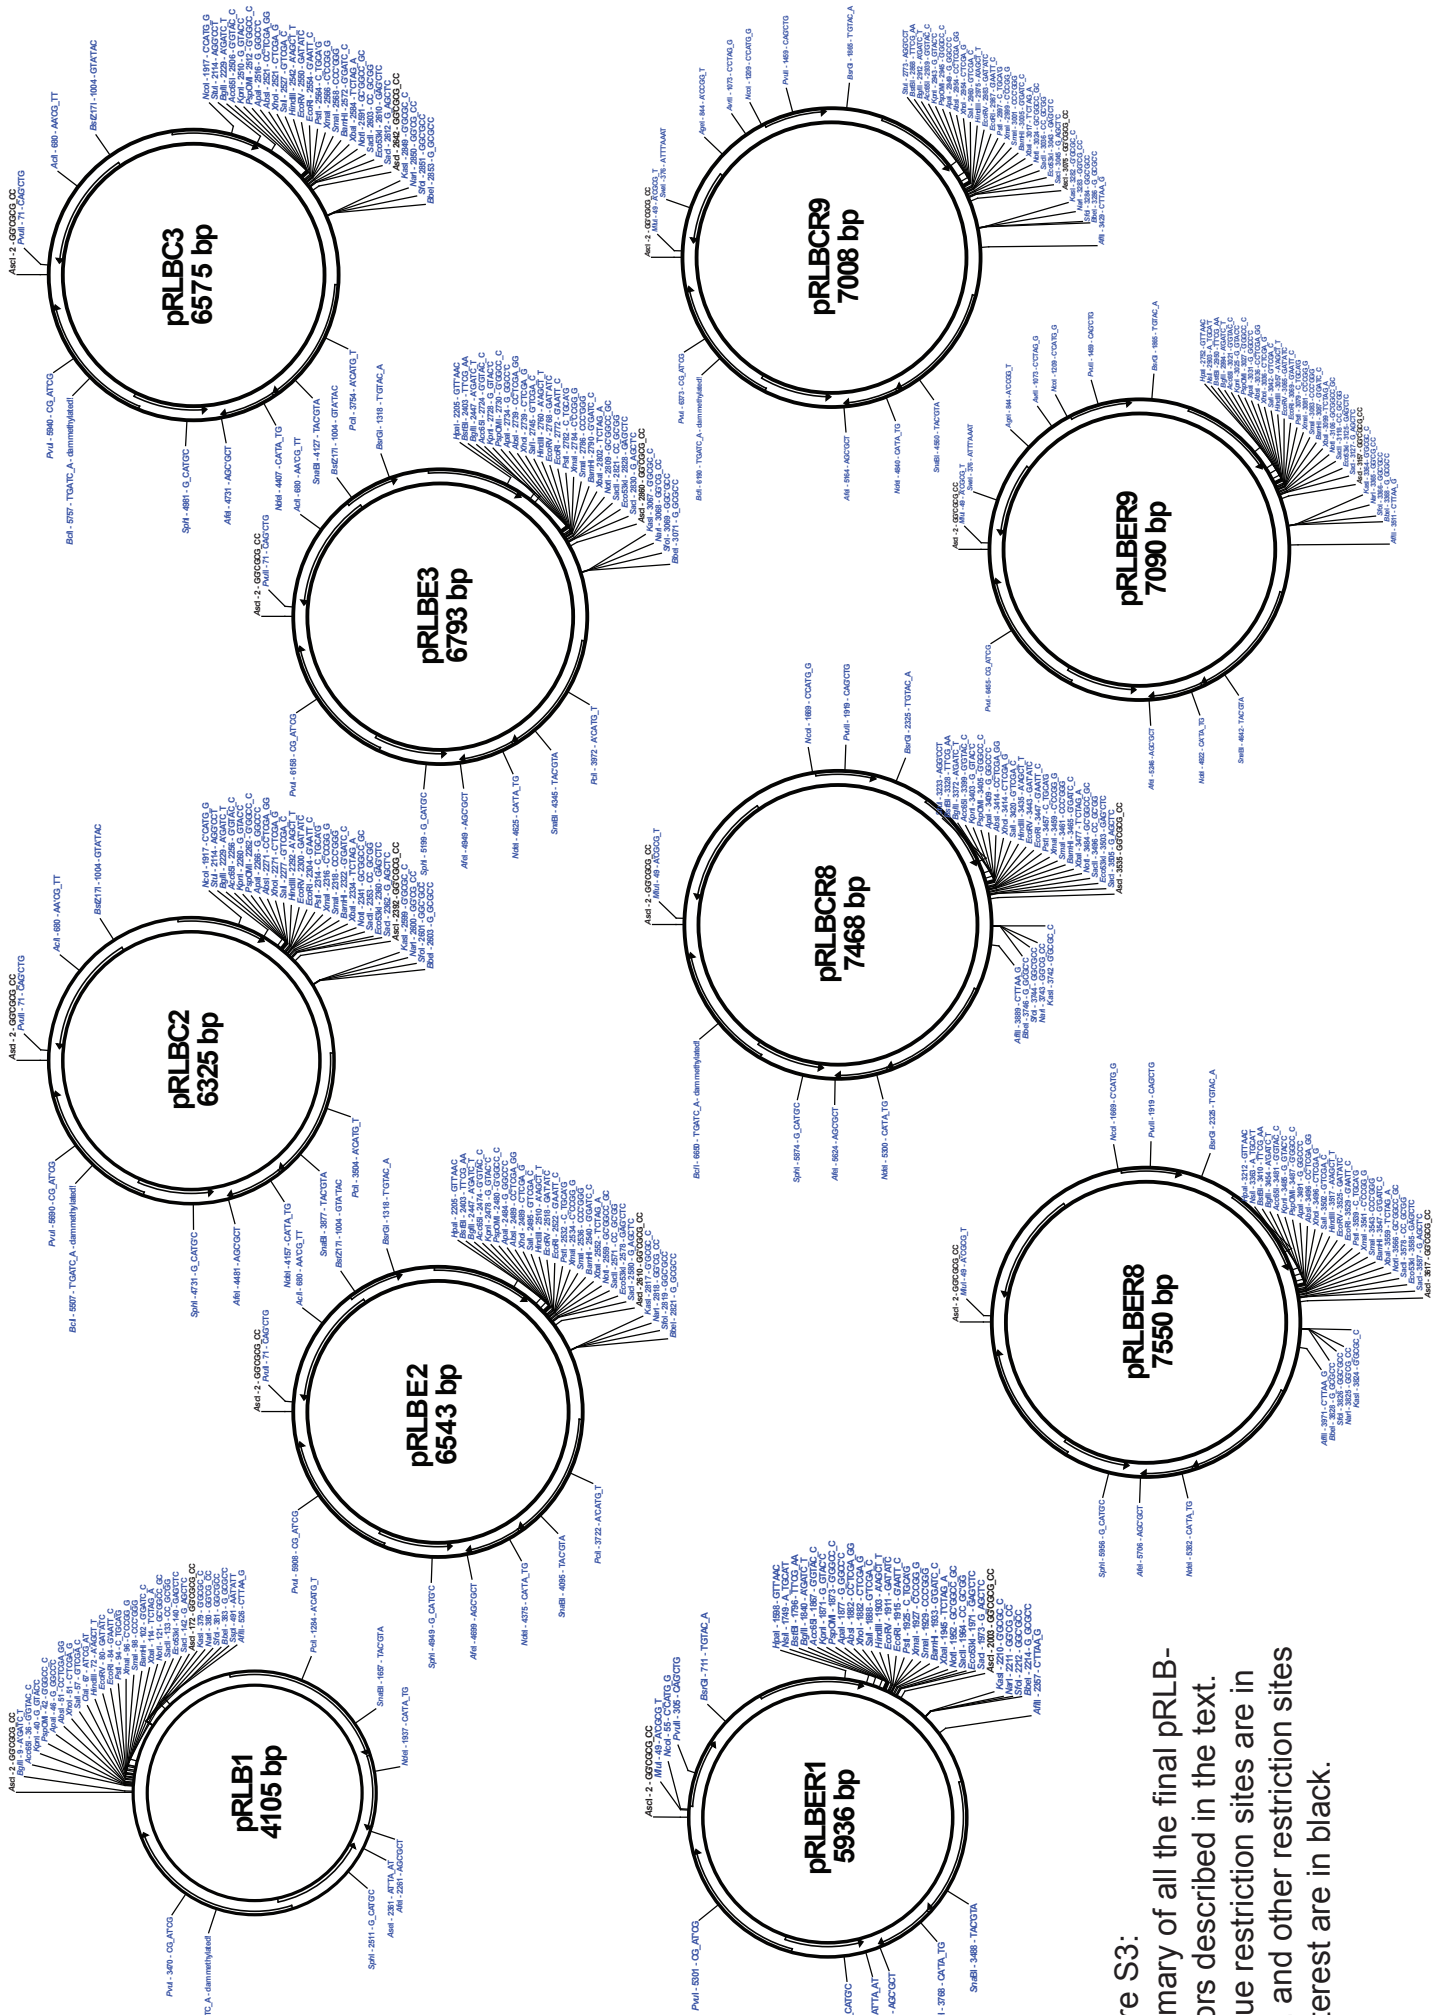

Figure S3:  
 Summary of all the final pRLB-  
 vectors described in the text.  
 Unique restriction sites are in  
 blue, and other restriction sites  
 of interest are in black.
