# Supplementary material
Source: PubMed Central journal article supplement (PMC3346405)
Supplement: supp_78.11.3846_AEM-AEM00202-12-s07.pdf [file supp_78.11.3846_AEM-AEM00202-12-s07.pdf]

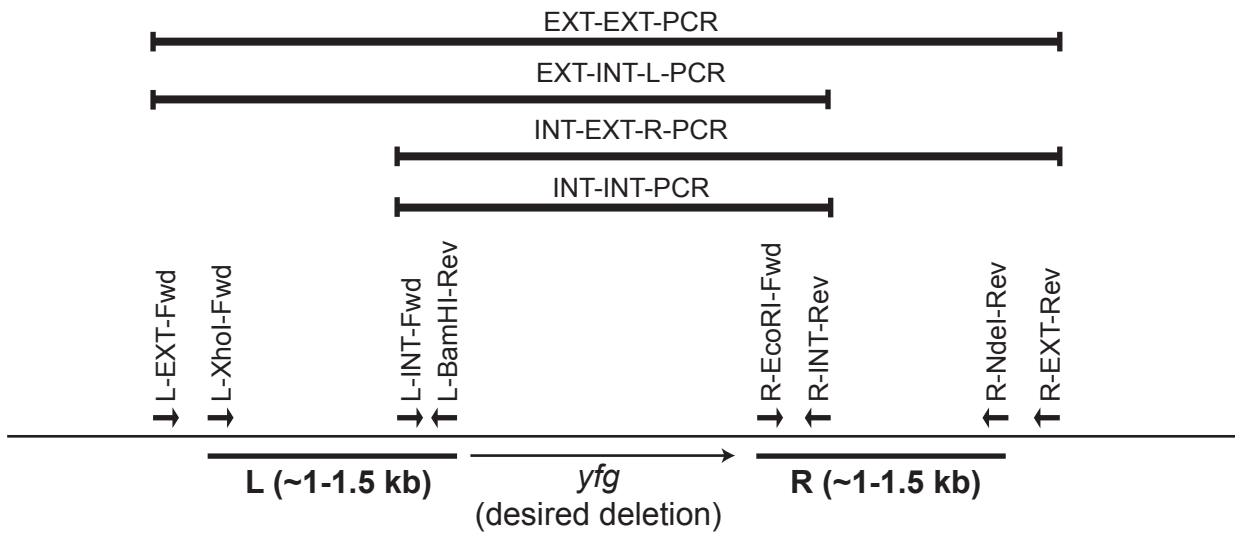

Figure S4:

Schematic drawing for primers and PCR-products used for generating and verifying mutants by allelic replacement.

L and R, regions surrounding *yfg*, which are cloned into the pRLY-vector to allow homologous recombination. Small arrows indicate primers. Primers L-XhoI-Fwd, L-BamHI-Rev, R-EcoRI-Fwd, and R-NdeI-Rev are examples of primers for cloning fragments L and R (the restriction sites are indicative). Primers L-EXT-Fwd, L-INT-Fwd, R-INT-Rev, and R-EXT-Rev are used to detect and verify the various stages in the mutant isolation procedure. Thick lines indicate which primer-pairs are used for the four combinations: EXT-EXT-PCR, EXT-INT-L-PCR, INT-EXT-R-PCR, and INT-INT-PCR.
